# Supplementary material for: Ganoderma (Ganodermataceae, Basidiomycota) Species from the Greater Mekong Subregion
Source: MDPI journal article supplement (doi:10.3390/jof7100819), 2021-09-30
Supplement: s1 [file s1]

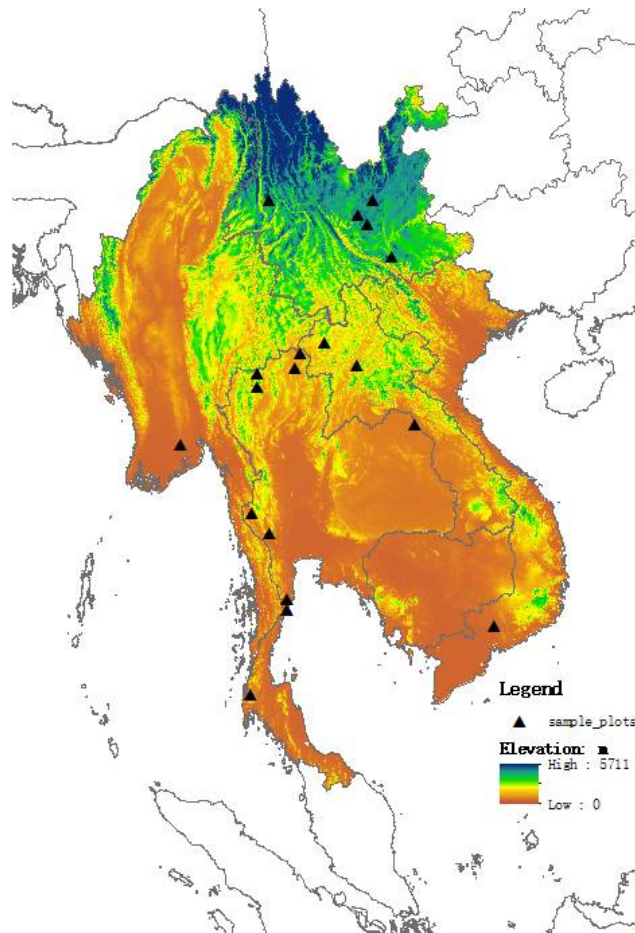

**Figure S1.** Collection sites of specimens used in this study in China, Laos, Myanmar, Thailand, and Vietnam. Black triangles indicate collection locations of the specimens.

**Table S1.** The extant *Ganoderma* species in the GMS.

| Countries |           | <i>Ganoderma</i> species                                                                                                                                                                                                                                                                                                                                                                    |
|-----------|-----------|---------------------------------------------------------------------------------------------------------------------------------------------------------------------------------------------------------------------------------------------------------------------------------------------------------------------------------------------------------------------------------------------|
| Laos      |           | <i>Ganoderma</i> <i>adpersum</i> , <i>G. australe</i> , <i>G. gibbosum</i> , <i>G. flexipes</i> , <i>G. luteomarginatum</i> , <i>G. lucidum</i> , <i>G. neojaponicum</i> , <i>G. nasalanense</i> , <i>G. subresinosum</i> , <i>G. tropicum</i>                                                                                                                                              |
| Myanmar   |           | <i>G. amboinense</i> , <i>G. applanatum</i> , <i>G. australe</i> , <i>G. gibbosum</i> , <i>G. hoehnelianum</i> , <i>G. multiplicatum</i> , <i>G. myanmarensense</i> , <i>G. neojaponicum</i> , <i>G. williamsianum</i>                                                                                                                                                                      |
| Thailand  |           | <i>G. adpersum</i> , <i>G. applanatum</i> , <i>G. australe</i> , <i>G. boninense</i> , <i>G. casuarinicola</i> , <i>G. donkii</i> , <i>G. ellipsoideum</i> , <i>G. gibbosum</i> , <i>G. lucidum</i> , <i>G. multipileum</i> , <i>G. orbiforme</i> , <i>G. philippii</i> , <i>G. sichuanense</i> , <i>G. sinense</i> , <i>G. subforficatum</i> , <i>G. thailandicum</i> , <i>G. tropicum</i> |
| Vietnam   |           | <i>G. applanatum</i> , <i>G. flexipes</i> , <i>G. gibbosum</i> , <i>G. hochiminhense</i> , <i>G. philippii</i>                                                                                                                                                                                                                                                                              |
| Yunnan    | Province, | <i>G. applanatum</i> , <i>G. australe</i> , <i>G. calidophilum</i> , <i>G. flexipes</i> , <i>G. gibbosum</i> ,<br>China                                                                                                                                                                                                                                                                     |
|           |           | <i>G. leucocontextum</i> , <i>G. lucidum</i> , <i>G. multiplicatum</i> , <i>G. resinaceum</i> , <i>G. sichuanense</i> , <i>G. sinense</i> , <i>G. tropicum</i> , <i>G. tsugae</i> , <i>G. weixiensis</i>                                                                                                                                                                                    |
